# Supplementary material for: Transcriptomic Profiling Reveals Metabolic and Regulatory Pathways in the Desiccation Tolerance of Mungbean (Vigna radiata [L.] R. Wilczek)
Source: Front Plant Sci. 2016 Dec 21;7:1921. doi: 10.3389/fpls.2016.01921 (PMC5174128; doi:10.3389/fpls.2016.01921)
Supplement: Table S5 — Gene Ontology enrichments of differentially expressed genes (DEGs) during different stages of imbibition in mungbean seeds. [file Table5.XLSX]

## Sheet: Sheet1
Table S5 Gene Ontology enrichments of differentially expressed genes (DEGs) during different stages of imbibition after dehydration in mungbean seeds.
3h vs 6h
GO term	Ontology	Description	Number in input	Number in BG/Ref	p-value	FDR
GO:0032502	P	developmental process	37	73	2.3e-27	2.7e-24
GO:0009628	P	response to abiotic stimulus	35	92	1.1e-22	6.5e-20
GO:0010033	P	response to organic substance	24	57	8.8e-17	3.4e-14
GO:0048856	P	anatomical structure development	21	41	3.4e-16	9.9e-14
GO:0032501	P	multicellular organismal process	35	175	3.2e-15	7.4e-13
GO:0050896	P	response to stimulus	87	1275	4e-09	7.7e-07
GO:0009719	P	response to endogenous stimulus	14	57	7.2e-08	1.2e-05
GO:0032787	P	monocarboxylic acid metabolic process	23	184	4.4e-07	5.6e-05
GO:0009725	P	response to hormone stimulus	13	57	4.4e-07	5.6e-05
GO:0009314	P	response to radiation	15	85	1e-06	0.00011
GO:0009416	P	response to light stimulus	15	85	1e-06	0.00011
GO:0009415	P	response to water	6	7	1.8e-06	0.00017
GO:0051707	P	response to other organism	6	8	3.1e-06	0.00027
GO:0042180	P	cellular ketone metabolic process	50	719	5.4e-06	0.00044
GO:0043436	P	oxoacid metabolic process	48	715	1.9e-05	0.0014
GO:0006082	P	organic acid metabolic process	48	716	2e-05	0.0014
GO:0019752	P	carboxylic acid metabolic process	48	715	1.9e-05	0.0014
GO:0006631	P	fatty acid metabolic process	16	132	3.4e-05	0.0021
GO:0042221	P	response to chemical stimulus	35	467	3.4e-05	0.0021
GO:0044281	P	small molecule metabolic process	84	1541	3.8e-05	0.0022
GO:0044255	P	cellular lipid metabolic process	31	414	9.4e-05	0.0051
GO:0010817	P	regulation of hormone levels	6	18	0.0001	0.0055
GO:0046700	P	heterocycle catabolic process	10	62	0.00013	0.0063
GO:0046148	P	pigment biosynthetic process	9	52	0.00017	0.0082
GO:0009653	P	anatomical structure morphogenesis	8	41	0.00019	0.0087
GO:0006790	P	sulfur metabolic process	11	83	0.00028	0.012
GO:0016054	P	organic acid catabolic process	7	34	0.00036	0.015
GO:0046395	P	carboxylic acid catabolic process	7	34	0.00036	0.015
GO:0016042	P	lipid catabolic process	6	25	0.00047	0.019
GO:0016053	P	organic acid biosynthetic process	25	340	0.00055	0.02
GO:0046394	P	carboxylic acid biosynthetic process	25	340	0.00055	0.02
GO:0006633	P	fatty acid biosynthetic process	12	109	0.0007	0.025
GO:0019748	P	secondary metabolic process	10	80	0.00079	0.027
GO:0006081	P	cellular aldehyde metabolic process	5	19	0.00099	0.033
GO:0044282	P	small molecule catabolic process	17	202	0.0011	0.034
GO:0042440	P	pigment metabolic process	9	69	0.0011	0.034
GO:0009605	P	response to external stimulus	7	42	0.0011	0.034
GO:0006721	P	terpenoid metabolic process	5	21	0.0015	0.044
GO:0016628	F	oxidoreductase activity, NAD or NADP as acceptor	8	14	3e-07	9.4e-05
GO:0016627	F	oxidoreductase activity, acting on the CH-CH group of donors	11	68	5.7e-05	0.009
GO:0009536	C	plastid	38	54	5.4e-32	9e-30
GO:0009507	C	chloroplast	34	48	7.9e-29	6.5e-27
GO:0042651	C	thylakoid membrane	6	8	3.1e-06	0.00017
GO:0005773	C	vacuole	6	10	7.8e-06	0.00032
GO:0044436	C	thylakoid part	9	55	0.00025	0.0069
GO:0044444	C	cytoplasmic part	77	1463	0.00022	0.0069
GO:0009579	C	thylakoid	13	125	0.00069	0.016
6h vs 18h
GO term	Ontology	Description	Number in input	Number in BG/Ref	p-value	FDR
GO:0055114	P	oxidation reduction	58	203	3e-20	8.2e-17
GO:0032259	P	methylation	30	90	1.4e-12	1.9e-09
GO:0006260	P	DNA replication	31	117	8.3e-11	7.6e-08
GO:0006730	P	one-carbon metabolic process	30	111	1.1e-10	7.6e-08
GO:0010383	P	cell wall polysaccharide metabolic process	11	14	2.7e-08	1.5e-05
GO:0010410	P	hemicellulose metabolic process	9	10	2.3e-07	0.00011
GO:0006275	P	regulation of DNA replication	10	15	3.5e-07	0.00014
GO:0005976	P	polysaccharide metabolic process	28	152	5.4e-07	0.00019
GO:0043414	P	macromolecule methylation	20	83	6.4e-07	0.0002
GO:0045491	P	xylan metabolic process	8	10	2e-06	0.00056
GO:0006259	P	DNA metabolic process	50	405	2.3e-06	0.00057
GO:0044036	P	cell wall macromolecule metabolic process	14	45	2.5e-06	0.00058
GO:0006261	P	DNA-dependent DNA replication	16	60	2.7e-06	0.00058
GO:0051567	P	histone H3-K9 methylation	7	7	3.4e-06	0.00068
GO:0006270	P	DNA replication initiation	8	13	8.2e-06	0.0013
GO:0015674	P	di-, tri-valent inorganic cation transport	13	43	7.5e-06	0.0013
GO:0034968	P	histone lysine methylation	8	13	8.2e-06	0.0013
GO:0070838	P	divalent metal ion transport	9	21	2.1e-05	0.0032
GO:0044262	P	cellular carbohydrate metabolic process	46	417	7e-05	0.01
GO:0051052	P	regulation of DNA metabolic process	10	36	0.00015	0.02
GO:0044264	P	cellular polysaccharide metabolic process	20	127	0.00015	0.02
GO:0000911	P	cytokinesis by cell plate formation	8	23	0.0002	0.024
GO:0046700	P	heterocycle catabolic process	10	38	0.00022	0.026
GO:0070592	P	cell wall polysaccharide biosynthetic process	5	8	0.00043	0.043
GO:0010413	P	glucuronoxylan metabolic process	5	8	0.00043	0.043
GO:0033205	P	cytokinesis during cell cycle	8	26	0.00039	0.043
GO:0045492	P	xylan biosynthetic process	5	8	0.00043	0.043
GO:0005506	F	iron ion binding	27	161	4.1e-06	0.0026
GO:0055044	C	symplast	17	19	9.8e-13	1.9e-10
GO:0009506	C	plasmodesma	17	19	9.8e-13	1.9e-10
GO:0005911	C	cell-cell junction	17	21	3e-12	3.7e-10
GO:0030054	C	cell junction	17	23	8.2e-12	7.8e-10
GO:0016021	C	integral to membrane	50	395	1.2e-06	9e-05
18h vs 24h
GO term	Ontology	Description	Number in input	Number in BG/Ref	p-value	FDR
GO:0055114	P	oxidation reduction	5	203	0.00013	0.0053
GO:0005576	C	extracellular region	5	285	0.00059	0.0087
